# Supplementary material for: Reciprocal Complementation of the Tumoricidal Effects of Radiation and Natural Killer Cells
Source: PubMed Central journal article supplement (PMC3636248; doi:10.1371/journal.pone.0061797), 2013-04-25
Supplement: pone.0061797.s005.pdf [file pone.0061797.s005.pdf]

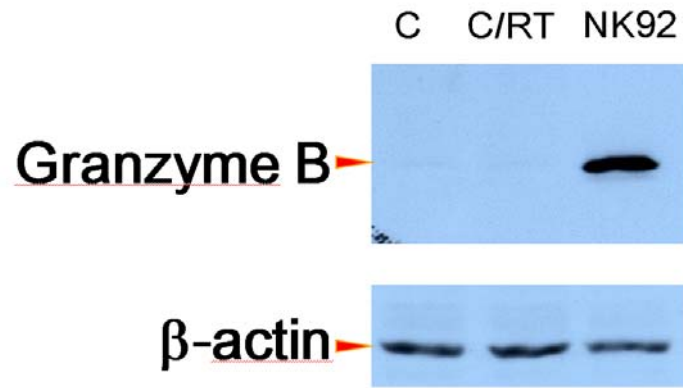

**Figure S5.** Granzyme B expression assay.
